# Supplementary figures and images for: An Unusual Case of Collision Testicular Tumor in a Female DSD Dog
Source: MDPI journal article supplement (doi:10.3390/vetsci10040251), 2023-03-27

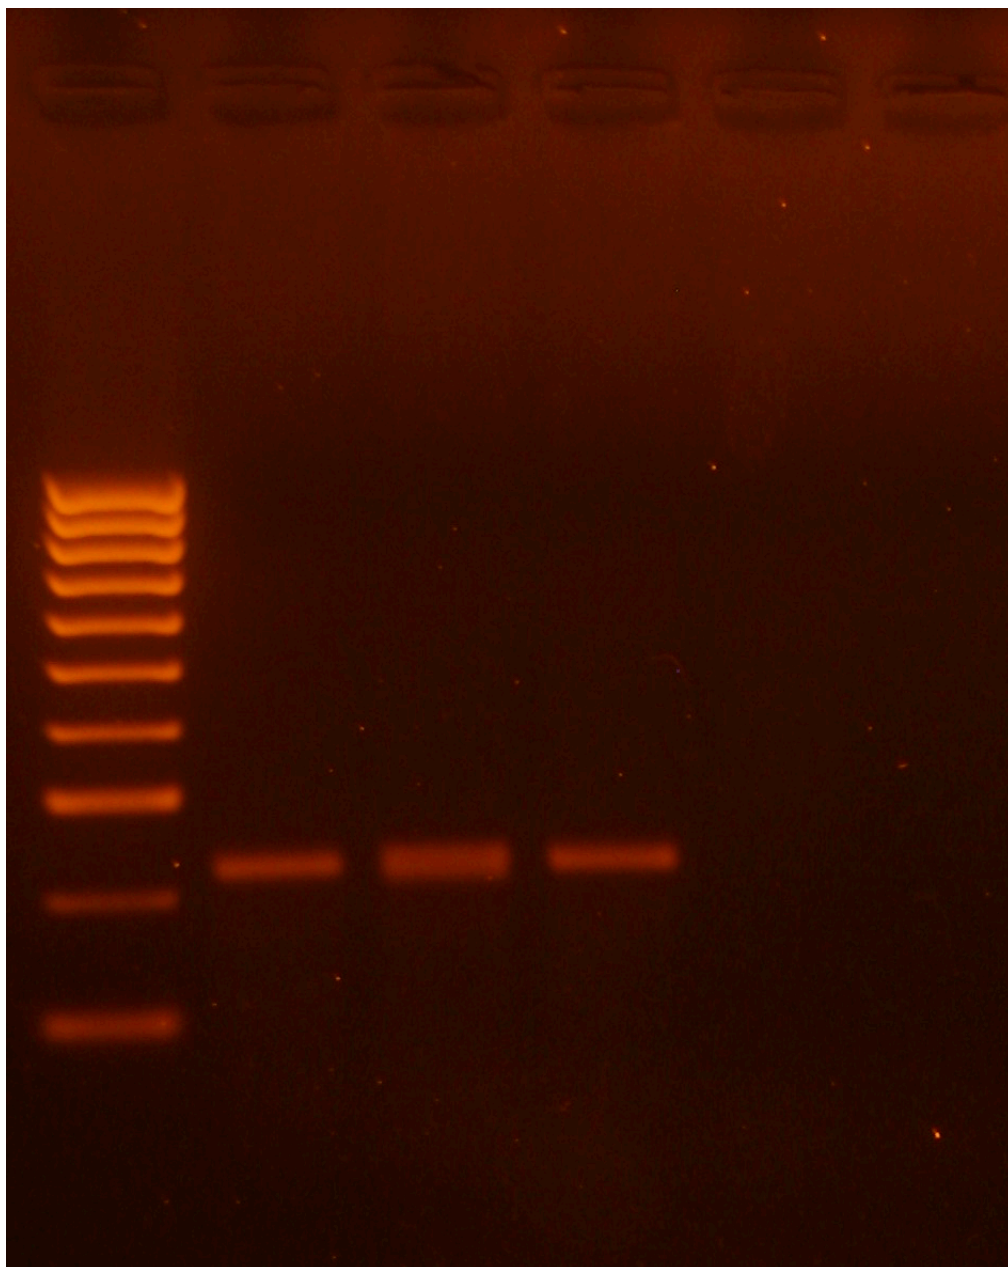

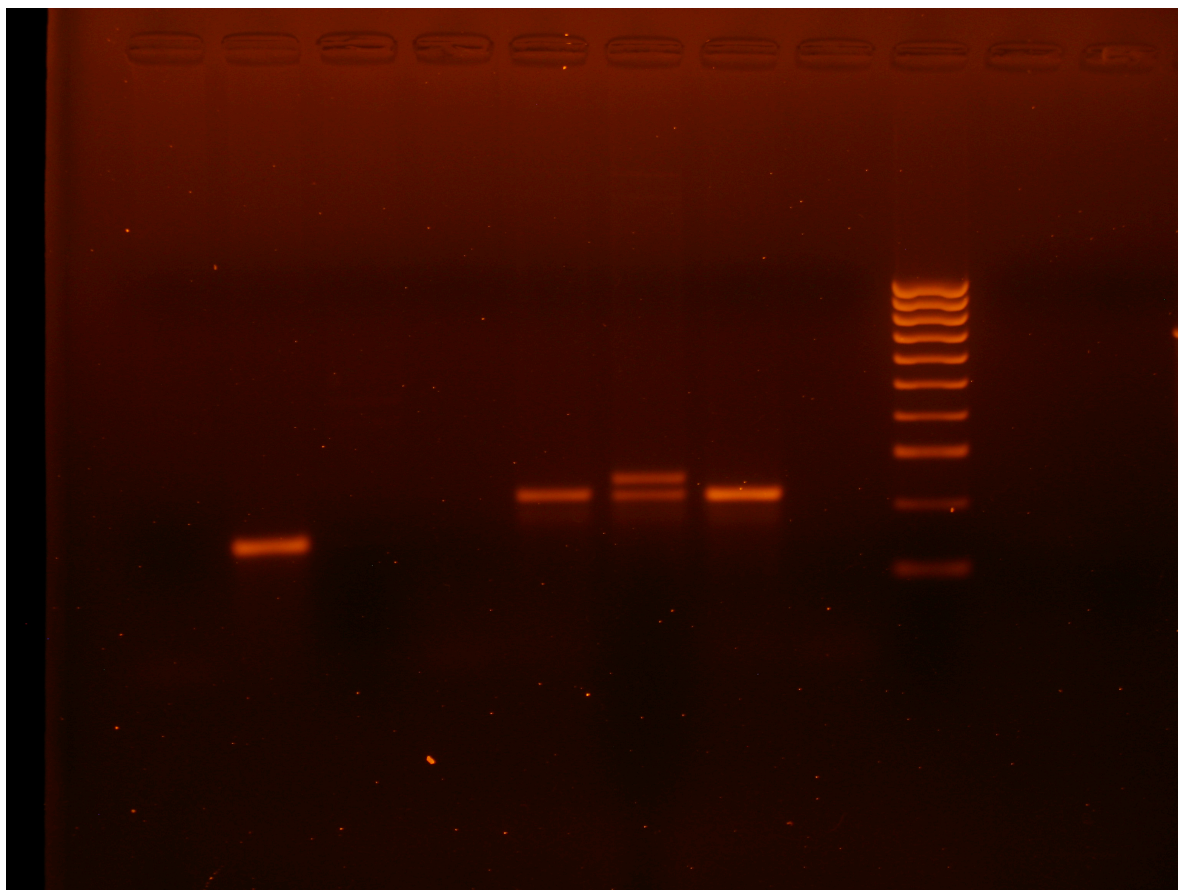

**Figure S1.** Original images for Figure 3.

Supplement: s1 [file s1]
